# Supplementary material for: Growth response of Emiliania huxleyi to ocean alkalinity enhancement
Source: Copernicus journal article supplement (doi:10.5194/egusphere-2024-2201), 2024-08-06
Supplement: Supplementary file [file egusphere-2024-2201-AC2-supplement.pdf]

We greatly appreciate the valuable comments and critical reading of the manuscript made by the two anonymous reviewers, which were useful in improving the scientific quality of the manuscript.

In the following sections, we have addressed each of your comments comprehensively, aiming to clarify and enhance the quality of our work as per your suggestions. For clarity, the lines mentioned in the rebuttal referred to the reviewed version of the manuscript.

Kind regards

Giulia Faucher and co-authors

Review – Faucher et al. Growth response of *Emiliana huxleyi* to ocean alkalinity enhancement

*The manuscript of Faucher et al. investigates the response of the coccolithophore Emiliana huxleyi (strain B92/11) to increased alkalinity (and associated decreased CO<sub>2</sub> and HCO<sub>3</sub><sup>-</sup> concentrations) in a culture experiment. The motivation for this study is very timely and important, given that the urgency of the climate crisis is fuelling intense focus on emissions mitigation technologies. One such approach is Ocean Alkalinity Enrichment, which may also mitigate ocean acidification. As these OAE experiments are already in trial phases, it is important to build an evidence base for the biological impacts of alkalinity enrichment on key marine organisms. The coccolithophore species E. huxleyi is often used as a model species for calcifying phytoplankton and is a common species in some of the regions where OAE trials have already been proposed or undertaken, e.g., in the North Atlantic shelf seas, and is therefore a very suitable candidate for the study objectives. The data presented by Faucher et al. specifically address alkalinity perturbations rather than manipulation of other aspects of the carbonate system, which have been the focus of previous work. They identify a growth rate response to alkalinity enrichment that leads to decrease POC and PIC production, identifying a threshold value above which the response is greatest. The methods, resultant data and the manuscript are of high quality and suitable for publication following minor revisions. I have made some general suggestions for additional details that can be included to provide more context for the magnitude and rate of alkalinity enhancement that may be realistic in OAE experiments. I also think that the discussion of the manuscript would benefit from a section discussing in a bit more detail the implications of the results for guiding recommendations for alkalinity enhancement trials and/or monitoring the impacts of OAE on the biosphere and/or highlighting future research priorities.*

**General comments:**

***The Introduction gives a good overview of previous studies that have investigated the response of phytoplankton and coccolithophores specifically to changes in carbonate chemistry conditions. But given the wide range of carbonate chemistry parameters that have been manipulated across published studies, I think it would be helpful in the introduction to very explicitly state what (if any) impact an increase in alkalinity has on pH, pCO<sub>2</sub>, DIC, and saturation state, in addition to ion concentration, so that it is very clear to the reader why pCO<sub>2</sub>-only experiments or pH-only experiments do not capture the same response as an OAE scenario.***

The different approaches of OAE (i.e. equilibrated versus non-equilibrated) are mentioned in lines 65-75. The changes in the carbonate chemistry induced by a non-equilibrated OAE (lower pCO<sub>2</sub> and high pH) are mentioned in line 73. In the new version of the manuscript, following the reviewer's requests, the changes in the carbonate chemistry induced by the OAE perturbation are made more explicit. The sentence is reformulated as follows:

*“However, in a non-equilibrated OAE approach where atmospheric equilibration of CO<sub>2</sub> is prevented (sensu Hartmann et al., 2022; Suitner et al., 2023), the carbonate chemistry shifts towards lower pCO<sub>2</sub> and higher [CO<sub>3</sub><sup>2-</sup>], pH and saturation states ( $\Omega$ ) for calcite and aragonite (Zeebe and Wolf-Gladrow, 2001). The impact of these more extreme conditions on marine calcifiers, as coccolithophores, has not yet been sufficiently investigated in order to assess the effects of ocean OAE on marine primary production.”*

Reference:

Zeebe, R. E. and Wolf-Gladrow, D.: CO<sub>2</sub> in Seawater: Equilibrium, Kinetics, Isotopes, Gulf Professional Publishing, 382 pp., 2001.

***The experiment is designed to inhibit equilibration of the culture media with the atmosphere after NaOH addition. In the field, how quickly would the surface ocean equilibrate with the atmosphere following OAE?***

*I.e., what is a likely duration of time for the phytoplankton community to be exposed to increased alkalinity conditions, such as imposed in your experiment? Would there be a progressive decrease in alkalinity following OAE such that populations would be exposed to a gradient of alkalinity over a period of time? Or would phytoplankton populations be more likely to experience an abrupt and large increase in alkalinity that progressively equilibrates over some time? Whilst the specifics of these real world OAE test settings are beyond the scope of your experimental study (and the details may not be available for industry reasons), some brief context of the reality of (proposed) OAE in terms of timescales and magnitude of alkalinity change (prior to the discussion where it is mentioned generally in Lns 185-189 but without specifics) would be useful context for your choice of experimental conditions and scaling from your results to real-world applications.*

Thanks for your comment. We added a sentence in line 190-196 to clarify and expand this concept:

*“The delivery of alkalinizing substances from platforms, pipes or ships to the Ocean is expected to cause an initial, localized impacts, potentially raising the pH above 9 (e.g., Bach et al., 2019; Suitner et al., 2023). These substances will dilute over years to decades (He and Tyka, 2023), lessening the disturbance. However, it's important to consider the biological impacts of the initial discharge. The localized, temporary increase in alkalinity and pH could create extreme conditions for marine organisms, potentially forming impact hotspots that affect phytoplankton species diversity and growth, with repercussions on trophic interactions higher up the food chain (Bach et al., 2019).”*

Reference:

Bach, L. T., Gill, S. J., Rickaby, R. E., Gore, S., and Renforth, P.: CO<sub>2</sub> removal with enhanced weathering and ocean alkalinity enhancement: potential risks and co-benefits for marine pelagic ecosystems, *Frontiers in Climate*, 1, 7, 2019.

He, J. and Tyka, M. D.: Limits and CO<sub>2</sub> equilibration of near-coast alkalinity enhancement, *Biogeosciences*, 20, 27–43, <https://doi.org/10.5194/bg-20-27-2023>, 2023.

Suitner, N., Faucher, G., Lim, C., Schneider, J., Moras, C. A., Riebesell, U., and Hartmann, J.: Ocean alkalinity enhancement approaches and the predictability of runaway precipitation processes – Results of an experimental study to determine critical alkalinity ranges for safe and sustainable application scenarios, *Earth System Science/Response to Global Change: Climate Change*, <https://doi.org/10.5194/egusphere-2023-2611>, 2023.

*You mention in the Introduction that calcification consumes alkalinity but is also a CO<sub>2</sub> source, thereby offsetting CO<sub>2</sub> drawdown through OAE (Lns 51-52). However, you don't mention this process further in the discussion. Is it not relevant at the cell concentrations you are using (although this might therefore, mean it is not relevant outside of the lab either, as cell concentrations in the 'real world' are also low much of the time) because you have no headspace equilibration, or because the PIC:POC in your experiments is <1? Perhaps you can loop back to this aspect in the discussion, especially as calcification as a net sink or source of CO<sub>2</sub> is a common theme in coccolithophore work.*

As mentioned in the reviewer's comment, we applied a non-equilibrated OAE manipulation ensuring that the bottles were sealed tightly to prevent CO<sub>2</sub> ingassing. Therefore, in our specific case, the increase in TA raised, in turn the pH, the of the aragonite and calcite and simultaneously caused a decline in CO<sub>2</sub>. As explained in lines 229-234, this perturbation may explain the reduction in calcification due to insufficient CO<sub>2</sub> and/or HCO<sub>3</sub><sup>-</sup> supply. On the other hand, when OAE is applied in an equilibrated way, as discussed by Bach et al., 2019 (i.e., where the alkaline solution is pre-equilibrated with CO<sub>2</sub>), calcifiers would experience more stable CO<sub>2</sub> and pH levels alongside a higher level of Ω aragonite and calcite, providing more favorable conditions for calcification. We chose not to modify the text, as we believe these concepts are already explained in the manuscript. Additionally, since our results are based on a bottle experiment involving a single strain of *Emiliana huxleyi*, we are cautious about generalizing our findings. Therefore, we decided not to expand the discussion to include the broader role of coccolithophore calcification as a net CO<sub>2</sub> sink or source under OAE scenarios.

*Given the obvious need for lab experiments with different phytoplankton (and other marine organisms) to provide evidence to guide safe OAE practices (which is a motivation for the research) and monitor the biological impacts of any OAE project, I feel that the manuscript should include at least a brief section in the discussion that interprets these data in the context of what is currently planned for OAE (e.g. the magnitude of alkalinity changes, timescales involved, spatial extent of OAE treatments that are likely, geographical regions of focus and how they overlap with where *E. huxleyi* is most abundant in phytoplankton communities)*

*so that you can make some initial recommendations. This could expand on Lns 225-230, which are currently very generalised and brief. It might be that this sort of discussion is planned for future manuscripts but interpreting the dataset beyond solely discussing the response of growth rate, POC and PIC production to elevated alkalinity would link back to your initial motivation for the experiments and make the article of greater interest to a wider audience. For example, is the threshold of 600  $\mu\text{mol kg}^{-1}$  addition comparable to the expected change in alkalinity likely to be used in OAE, or is that much larger or smaller than likely to be used? Would your recommendation therefore be that because we now have evidence that additions beyond 600  $\mu\text{mol kg}^{-1}$  will alter the productivity of *E. huxleyi*, OAE trials should not exceed this? Or that changes in *E. huxleyi* productivity/abundance should be monitored during OAE trials, especially in areas like the UK shelf seas and the North Atlantic where *E. huxleyi* is a very common component of the phytoplankton community? Do your results have any relevance for OAE that uses something other than NaOH (maybe other alkali that have the same impact on carbonate chemistry), or does that require further experimentation, at least for confirmation? Are your results useful for constraining biogeochemical models that investigate the impacts of OAE on the marine system?*

We thank the reviewer for this thoughtful comment. We took the opportunity to revise parts of the introduction and the discussion/conclusion sections. While we appreciate the suggestions made by the reviewer, we do not fully agree with all of them. Many of the questions raised extend far beyond the scope of this work and are too complex to be addressed by a single bottle experiment. We will clarify our position in the following lines:

1. *I feel that the manuscript should include at least a brief section in the discussion that interprets these data in the context of what is currently planned for OAE (e.g. the magnitude of alkalinity changes, timescales involved, spatial extent of OAE treatments that are likely, geographical regions of focus and how they overlap with where *E. huxleyi* is most abundant in phytoplankton communities) so that you can make some initial recommendations:*

We believe that laboratory experiments are essential for identifying the root cause of physiological responses, as they allow for observations in highly controlled environments using model species. Laboratory studies help establish cause-effect relationships. In the context of OAE, they are necessary for generating hypotheses to test in the field. However, drawing conclusions from a culture experiment with a single strain of one species is not appropriate, as bottle experiments, by definition, cannot provide insight into ecosystem-level impacts of OAE.

2. *For example, is the threshold of 600  $\mu\text{mol kg}^{-1}$  addition comparable to the expected change in alkalinity likely to be used in OAE, or is that much larger or smaller than likely to be used? Would your recommendation therefore be that because we now have evidence that additions beyond 600  $\mu\text{mol kg}^{-1}$  will alter the productivity of *E. huxleyi*, OAE trials should not exceed this? Or that changes in *E. huxleyi* productivity/abundance should be monitored during OAE trials, especially in areas like the UK shelf seas and the North Atlantic where *E. huxleyi* is a very common component of the phytoplankton community?*

Following the recommendations of the Best Practice Guide for OAE (Oschlies et al., 2023), this study tested the response of a species of coccolithophore algae to elevated TA conditions. The range tested remains within the proposed alkalinity targets, reaching approximately 3000–4000  $\mu\text{mol kg}^{-1}$  (Renforth and Henderson, 2017). In this experiment, the highest TA tested was below 4000  $\mu\text{mol kg}^{-1}$ . While these alkalinity conditions may appear extreme, they can be valuable for identifying thresholds of alkalinity enhancement. Although these conditions might fall outside worst-case scenario projections, they contribute to a better understanding of biological responses to OAE applications. We add a sentence in the discussion (lines 196-198).

*“The range tested remains within the proposed alkalinity targets, reaching approximately 3000–4000  $\mu\text{mol kg}^{-1}$  (Renforth and Henderson, 2017). In this experiment, the highest TA tested was below 4000  $\mu\text{mol kg}^{-1}$ .”*

Reference:

Renforth, P. and Henderson, G.: Assessing ocean alkalinity for carbon sequestration, *Reviews of Geophysics*, 55, 636–674, 2017.

**3. Do your results have any relevance for OAE that uses something other than NaOH (maybe other alkali that have the same impact on carbonate chemistry), or does that require further experimentation, at least for confirmation?**

Reviewer 2 raised a specific question regarding our choice to test NaOH. We have clarified our reasoning by adding a sentence in the discussion (lines 188-189). A more comprehensive explanation is also provided in the subsequent lines of this rebuttal (see the Specific Comment section).

Among the different sources of alkalinity, the addition of NaOH in a non-equilibrated way increasingly gains attention due to its smaller environmental footprint and high dissolution rates (Hartmann et al., 2023; Iglesias-Rodríguez et al., 2023; Riebesell et al., 2023). *For these reasons, NaOH is considered one of the most suitable feedstocks for OAE in pelagic environments (Eisaman et al., 2023; Iglesias-Rodríguez et al., 2023), with field trials already considering its use.*

**4. Are your results useful for constraining biogeochemical models that investigate the impacts of OAE on the marine system?**

This study, to the best of our knowledge, is the first to evaluate the impact of non-equilibrated OAE on a model species like *E. huxleyi*, laying a solid groundwork for future research in this field. However, a single-species experiment is not enough to constrain biogeochemical models on OAE. To do so, we need to integrate different levels of biological organization from species to ecosystem.

***In your PIC:POC data, there are significantly lower values for TA conditions 2433, 2482, and 2499, but you don't discuss this in the text at all – is there a likely explanation for this?***

The low values at TA 2433 and 2492  $\mu\text{mol kg}^{-1}$  of the PIC:POC, depend on the high POC values obtained for these two samples. The low values of the PIC:POC at 2499  $\mu\text{mol kg}^{-1}$  might be the result of an error during the filtration process and, therefore a possible outlier. We added a sentence in the results on lines 179-182

*“The low PIC (0.11 pg cell<sup>-1</sup>\*d<sup>-1</sup>) value obtained at TA 2499  $\mu\text{mol kg}^{-1}$  is likely an outlier. We hypothesized that this discrepancy may be due to an error in reporting the filtration volume for TPC for this sample. Despite this, the sample was retained for analysis, as no other anomalies were observed in either the carbonate chemistry parameters or the growth of *E. huxleyi*. Statistical analyses were conducted both with and without this sample, and no significant differences were observed in the final results.”*

**Specific comments:**

***Ln 26: I think “adapted” should be “adopted” here?***

The text has been modified.

***Ln 34-35: you could specify one or two examples of which minerals you are referring to here.***

The text was modified, adding a few examples.

*“One proposed method to remove CO<sub>2</sub> from the atmosphere mimics the natural process of rock weathering, whereby suitable minerals (i.e. Olivine, Basalt, Carbonate) are extracted and introduced into the surface ocean (Ocean Alkalinity Enhancement, OAE; Gattuso et al., 2015; GESAMP, 2019).”*

***Ln 40: could you contextualise “gigatonnes of carbon” with respect to typical annual emissions or oceanic carbon uptakes, or similar, for context? e.g., CO<sub>2</sub> absorption equivalent to 2% current annual anthropogenic CO<sub>2</sub> emissions, or whatever it actual is.***

To the best of our knowledge, no study so far has been able to give such an estimate. The sentence was revised as follows:

*“Theoretical studies indicate that OAE has the potential to remove 3 to 30 gigatonnes of carbon dioxide/year (; Renforth and Henderson, 2017; Feng et al., 2017) from the atmosphere and thus contribute to global climate change mitigation efforts.”*

**Ln 76: I think this conclusion that *E. huxleyi* is the ‘sole coccolithophore species’ not showing a neutral effect to alkalinity, whilst accurate based on their analysis, comes across as a bit too decisive considering that the study in question only synthesised a limited amount of data (5 studies I think) from 5 species. I would suggest rephrasing to something more like “Of the five coccolithophore species included in the meta-analysis of Bednaršek et al. (2024), *E. huxleyi* was the only species where calcification did not show a neutral response to increased alkalinity.”**

We followed the reviewer suggestion and changed the text accordingly.

**Ln 87: it would be useful to mention where this strain was isolated in addition to the culture collection information.**

The strain was obtained from the Plymouth Marine Laboratory. The information is now added to the text.

**Ln 95 (also Ln 79 in the Introduction): NaOH is presumably one of several options for changing alkalinity chemically (I have seen proposals using magnesium hydroxide for instance). Was there a reason that you used NaOH specifically over other options?**

We agree with the reviewer that NaOH is just one of the several potential feedstocks that can be used for OAE. We choose NaOH for several reasons:

1. NaOH is one of the most suitable feedstocks for OAE approaches, with field trials already considering its use (i.e., LOC-NESS project PI: Adam Subhas; <https://subhaslab.whoi.edu/loc-ness/>).
2. NaOH is considered one of the most suitable feedstocks to be used in pelagic environments since it dissolved easily in seawater compared to other materials (e.g., Mg(OH)<sub>2</sub>)
3. We aimed to investigate the effects of the carbonate chemistry changes induced by the addition of alkaline substances without introducing other elements (e.g., trace metals). For this reason, we discarded other potential materials and we chose NaOH.

**Ln 205: should be “CCMs”, plural**

CCMs was already plural in the original version at line 206

**Ln 205: Based on carbon isotopic composition of alkenones, there is evidence that CCMs may have evolved in coccolithophores as early as the Miocene (Bolton and Stoll 2013), i.e., significantly earlier than the first appearance of *E. huxleyi*. I would suggest replacing *E. huxleyi* with Noelaerhabdaceae and rephrasing the sentence so that the evolution of CCMs sound less like a sentient choice, e.g. something along the lines of “The timing of CCM evolution may have been a response to declining atmospheric CO<sub>2</sub> concentrations during the Neogene, thus enabling Noelaerhabdaceae like *E. huxleyi* to maintain competitive growth rates under lower CO<sub>2</sub> levels”**

We followed the reviewer’s advice and rephrased the sentence accordingly (now at Line 219)

**Ln 213-214: there is an incorrect placement of a comma and a missing comma in this sentence. It should read “In principle, the alkalinity additional increased Wcalcite (Table 2), which...”**

Thanks for the comment. The text has been modified accordingly.

**Ln 216: typo – exchange “weather” with “whether”.**

Text modified

**Ln 217-219: Can you clarify what you mean here, linking coccosphere formation with growth rate and reduction in cellular PIC? With a lower growth rate, there would be on average a longer duration between successive cell divisions for the generation of new coccoliths – might this not then reasonably be expected to increase cellular PIC because there is more time for more coccoliths to be produced each cell division cycle? Or here do you refer to PIC production rather than cellular PIC?**

Yes, we refer to PIC production, and we added “production” to the text for clarity.

As mentioned in the text, Kottmeier et al.(2020) demonstrated that the cellular ratio of calcium carbonate to organic carbon remains relatively stable throughout the cell cycle. The production of calcium carbonate is closely linked with the increase in biomass and volume of exponential growth (Kottmeier et al., 2020). Therefore, the

number of coccoliths remains fairly constant in proportion to the cell volume throughout the cell cycle. In other words, newly divided cells are small but fully covered with coccoliths.

Reference:

Kottmeier, D. M., Terbrüggen, A., Wolf-Gladrow, D. A., and Thoms, S.: Diel variations in cell division and biomass production of *Emiliania huxleyi*—Consequences for the calculation of physiological cell parameters, *Limnology and Oceanography*, 65, 1781–1800, <https://doi.org/10.1002/lno.11418>, 2020.

**Ln 226: can you suggest here how long this period might be – are we talking hours/days/months etc. Are there any foreseeable implications of this conclusion for when alkalinity enrichment could/should be carried out (i.e. time of year) to minimise the impact on community composition?**

1. We added this information to the text along with a reference (line 243): “CO<sub>2</sub> equilibration would occur on the order of weeks to months (Ringham et al., 2024), thus, within the period after the addition of alkaline substances, *E. huxleyi* may experience a competitive disadvantage compared to other species or phytoplankton groups that have more effective CCM strategies.”
2. Regarding the second request, as mentioned in the text, the strain of *E. huxleyi* used for this experiment suggests that for non-equilibrated OAE to be applied safely, the ΔTA should not exceed 600 μmol kg<sup>-1</sup>. However, we are cautious about extrapolating broader conclusions on when OAE should be applied to minimize its impact on community composition, as our findings are based on a single-bottle experiment with one strain of *E. huxleyi*.

**Ln 227: is there evidence from the literature to indicate which other phytoplankton groups, e.g., diatoms, might have a competitive advantage then in this scenario? E.g., the study of Gately et al. (2023) that also investigated *Chaetoceros*.**

We added to the sentence a few references of studies that investigated the carbon acquisition of marine phytoplankton. These studies were aimed at understanding the response of marine phytoplankton to OA. Through testing several CO<sub>2</sub> ranges, they evidenced a more efficient CCM of diatoms and dinoflagellates compared to coccolithophore and specifically to *E. huxleyi*.

In the context of OAE, to the best of our knowledge, only a few studies investigate the response of phytoplankton to non-equilibrated OAE conditions in culture experiments. Gately et al. (2023), as mentioned before, tested a different OAE scenario where TA was manipulated in an equilibrated/semi-equilibrated way. Therefore, the pH only slightly increased, and the algae did not experience CO<sub>2</sub> limitation conditions. In a study still under discussion by Oberlander et al., (Biogeosciences, under discussion), the authors investigated the impacts of short-term elevation in pH after OAE manipulation on the growth rates of a diatom and a prymnesiophyte. This study shows no significant impacts on the growth rates of the diatom *Thalassiosira pseudonana* and the prymnesiophyte *Diacronema lutheri* with short-term (10-minute) exposure to elevated pH but evidenced a significant decrease in growth rates with long-term (8 days). The study by Oberlander et al. (2024) has not been discussed in our study because it focuses on identifying pH threshold values rather than implications for CO<sub>2</sub> limitation conditions.

Reference:

Oberlander, J. L., Burke, M. E., London, C. A., & MacIntyre, H. L. (2024). Assessing the impacts of simulated Ocean Alkalinity Enhancement on viability and growth of near-shore species of phytoplankton. *EGUsphere*, 2024, 1-21.

**References: I haven't proof-read the references in any detail but can see that many need final formatting and you should check the correct referencing format for EGU sphere preprints.**

*References were checked and reformatted when needed.*

#### **References mentioned in this review:**

Bednaršek, N., Pelletier, G., Van De Mortel, H., García-Reyes, M., Feely, R., and Dickson, A.: Unifying framework for assessing sensitivity for marine calcifiers to ocean alkalinity enhancement identifies winners, losers and biological thresholds – importance of caution with precautionary principle. *EGUsphere* [preprint], <https://doi.org/10.5194/egusphere-2024-947>, 2024.

Bolton, C. T and Stoll, H. M.: Late Miocene threshold response of marine algae to carbon dioxide limitation, *Nature*, 500, 558-562, <https://doi.org/10.1038/nature12448>, 2013.

Gately, J. A., Kim, S. M., Jin, B., Brzezinski, M. A., and Iglesias-Rodriguez, M. D.: Coccolithophores and diatoms resilient to ocean alkalinity enhancement: A glimpse of hope?, *Science Advances*, 9, eadg6066, <https://doi.org/10.1126/sciadv.adg6066>, 2023
